# Supplementary material for: A bin microphysics parcel model investigation of secondary ice formation in an idealised shallow convective cloud
Source: Copernicus journal article supplement (doi:10.5194/acp-23-9099-2023), 2023-08-17
Supplement: Supplementary file 1 [file acp-23-9099-2023-supplement.pdf]

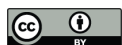

*Supplement of*

## **A bin microphysics parcel model investigation of secondary ice formation in an idealised shallow convective cloud**

**Rachel L. James et al.**

*Correspondence to:* Rachel L. James ([r.james@leeds.ac.uk](mailto:r.james@leeds.ac.uk)) and Paul J. Connolly ([paul.connolly@manchester.ac.uk](mailto:paul.connolly@manchester.ac.uk))

The copyright of individual parts of the supplement might differ from the article licence.

## SECTION S1: Temperature profiles

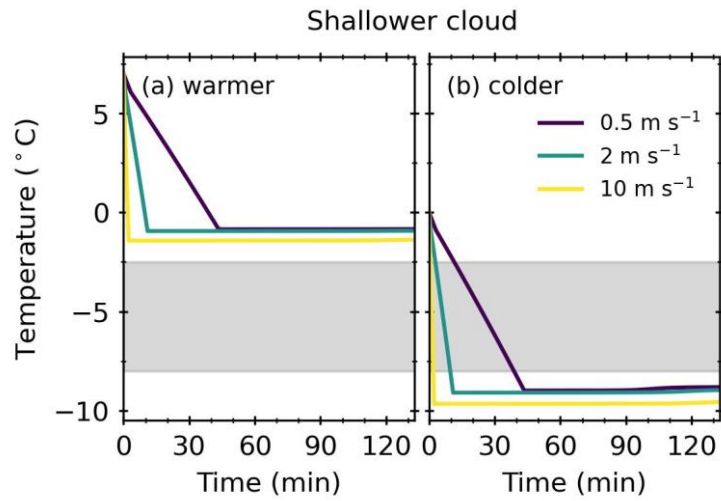

**Figure S1** Temperature profiles of a shallower (1.3 km deep) cloud. Warmer refers to cloud base temperatures of 7 °C, and colder refers to cloud base temperatures of 0 °C. The grey shaded regions indicate the temperature region in which rime-splintering could be active.

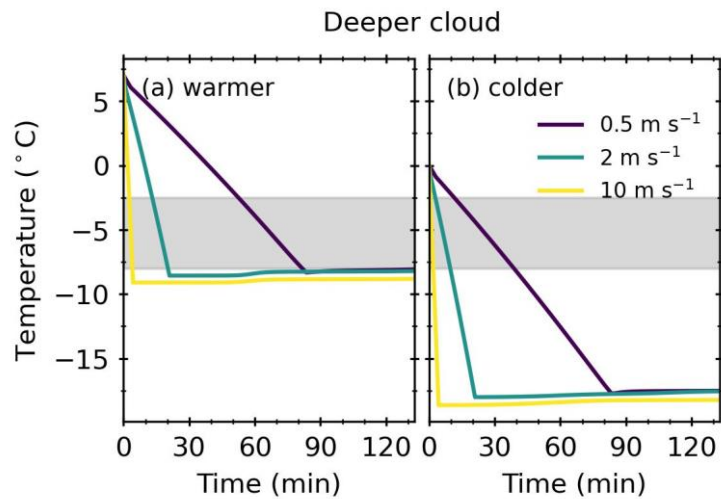

**Figure S2** Temperature profiles of a deeper (2.4 km) cloud. Warmer refers to cloud base temperatures of 7 °C, and colder refers to cloud base temperatures of 0 °C. The grey shaded regions indicate the temperature region in which rime-splintering could be active.

**SECTION S2:** Additional figures for shallower clouds with a natural aerosol size distribution

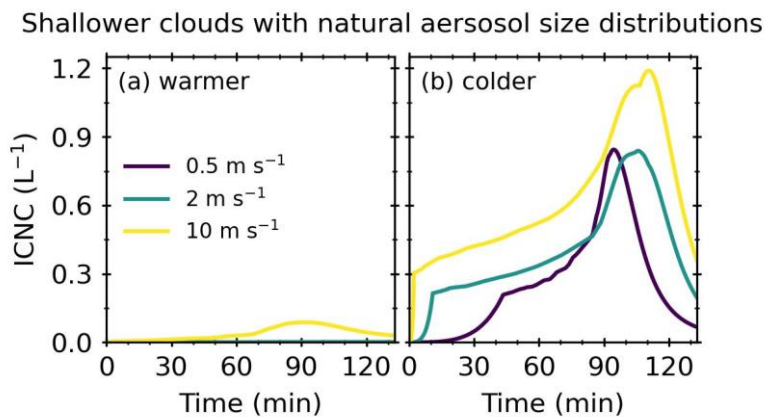

**Figure S3** Control simulation ice crystal number concentrations for shallower clouds (1.3 km deep) with a natural aerosol size distribution. Warmer refers to cloud base temperatures of 7 °C, and colder refers to cloud base temperatures of 0 °C.

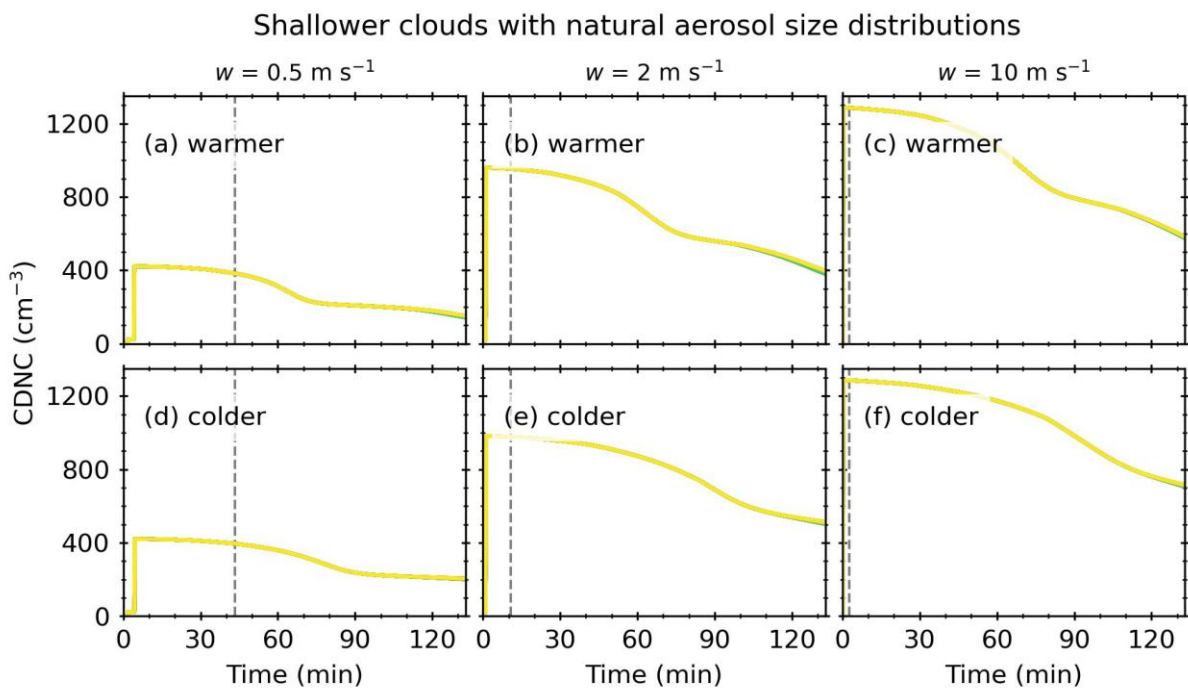

**Figure S4** Cloud drop number concentrations for a shallower cloud (1.3-km deep) with a natural aerosol size distribution. Warmer refers to cloud base temperatures of 7 °C, and colder refers to cloud base temperatures of 0 °C.

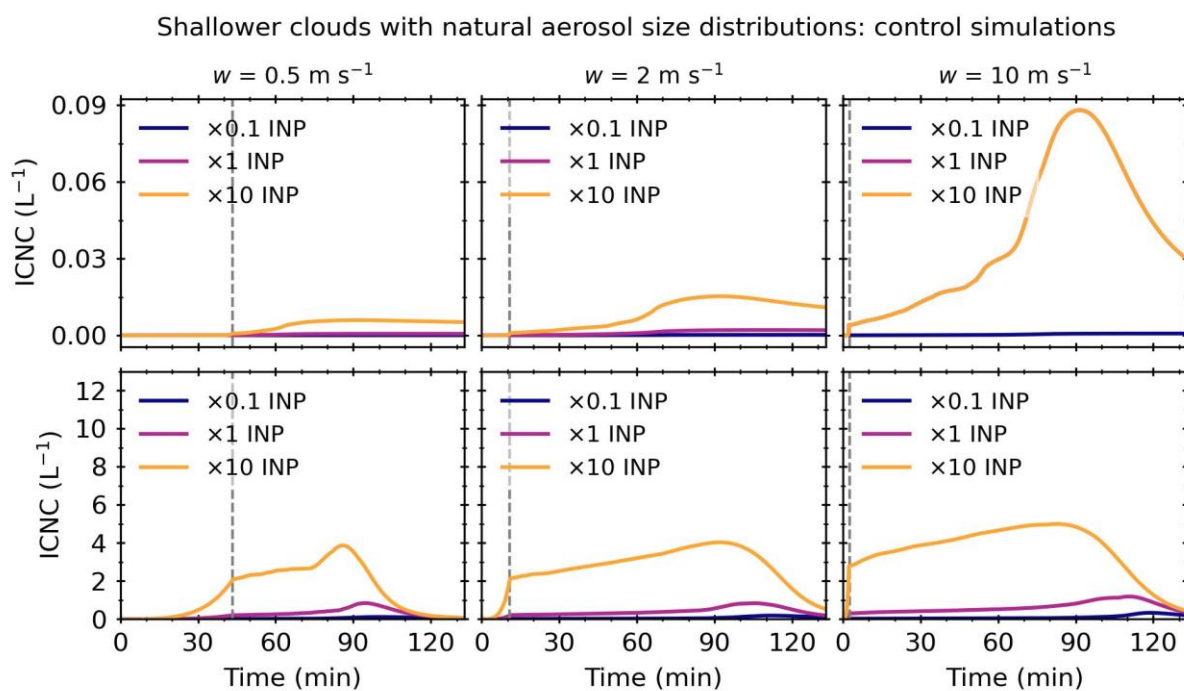

**Figure S5** Ice crystal number concentrations for control simulations against simulation time for three initial INP concentrations ( $\times 0.1$ ,  $\times 1$  and  $\times 10$ ) for a shallower cloud (1.3 km deep) with a natural aerosol size distribution. Warmer refers to cloud base temperatures of  $7\text{ }^{\circ}\text{C}$ , and colder refers to cloud base temperatures of  $0\text{ }^{\circ}\text{C}$ .

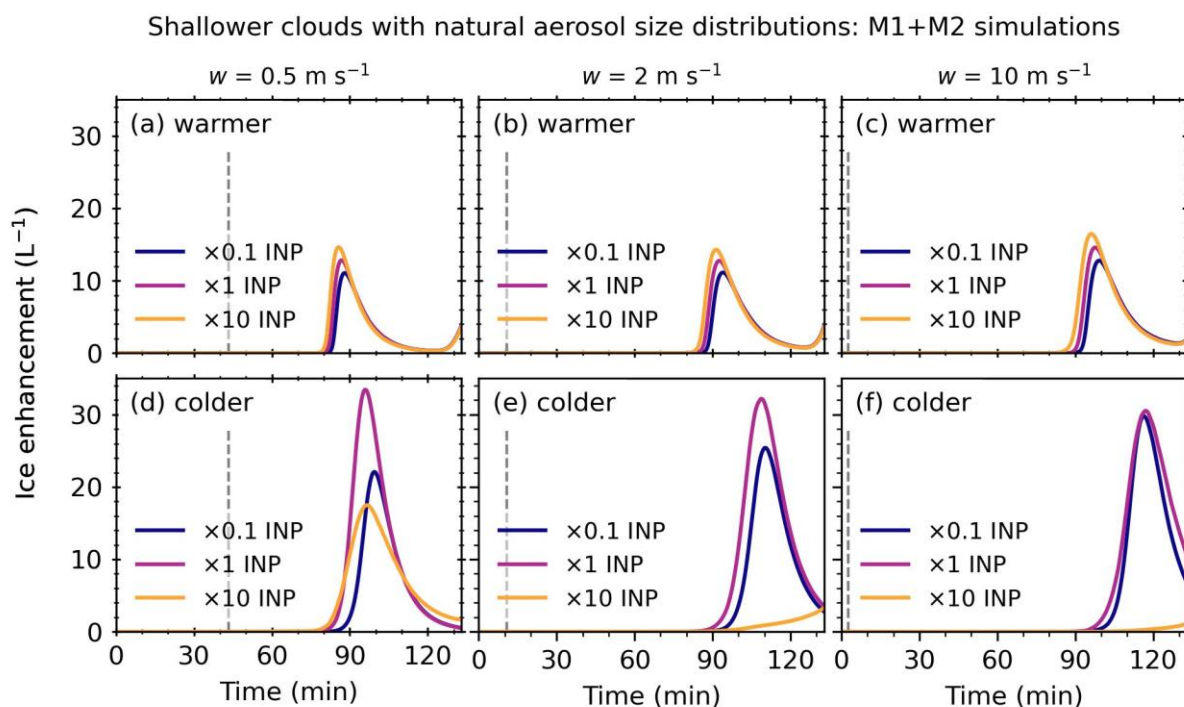

**Figure S6** Mode 1 and mode 2 ice enhancement against simulation time for three INP concentrations ( $\times 0.1$ ,  $\times 1$  and  $\times 10$ ) for a shallower (1.3 km deep) cloud with a natural aerosol size distribution. Warmer refers to cloud base temperatures of  $7\text{ }^{\circ}\text{C}$ , and colder refers to cloud base temperatures of  $0\text{ }^{\circ}\text{C}$ .

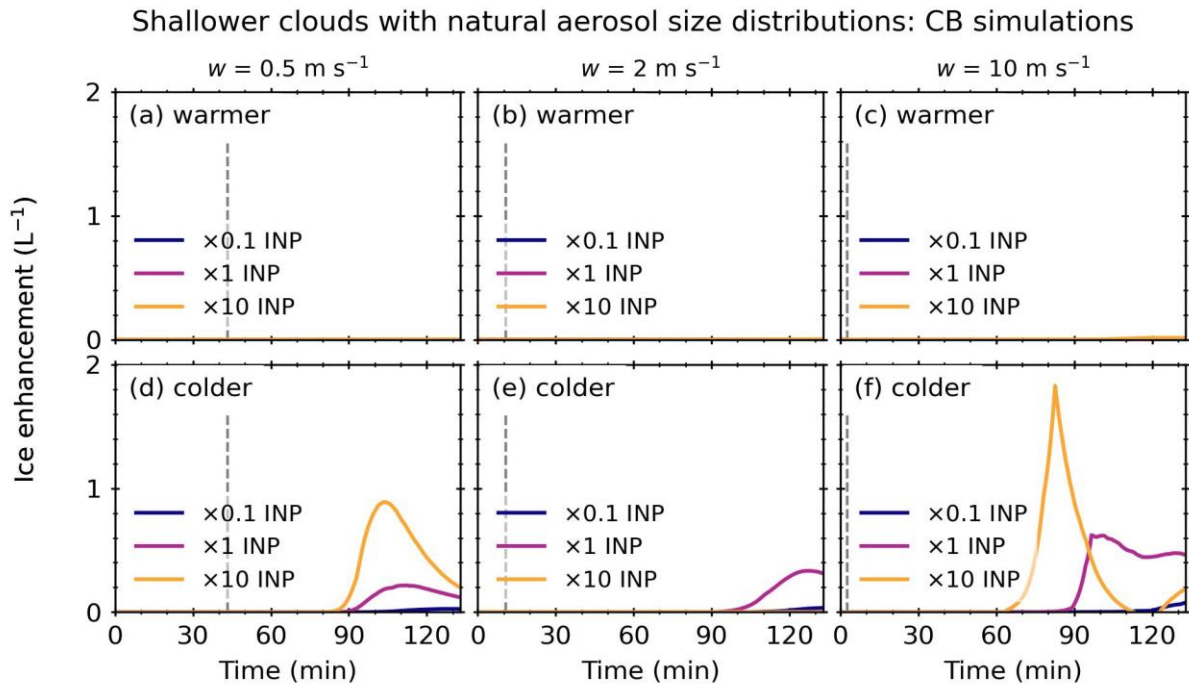

**Figure S7** Ice-ice collisional breakup ice enhancement against simulation time for three INP concentrations ( $\times 0.1$ ,  $\times 1$  and  $\times 10$ ) for a shallower (1.3 km deep) cloud with a natural aerosol size distribution. Warmer refers to cloud base temperatures of  $7^\circ\text{C}$ , and colder refers to cloud base temperatures of  $0^\circ\text{C}$ .

**SECTION S3:** Additional figures for shallower clouds with a near-city size distribution

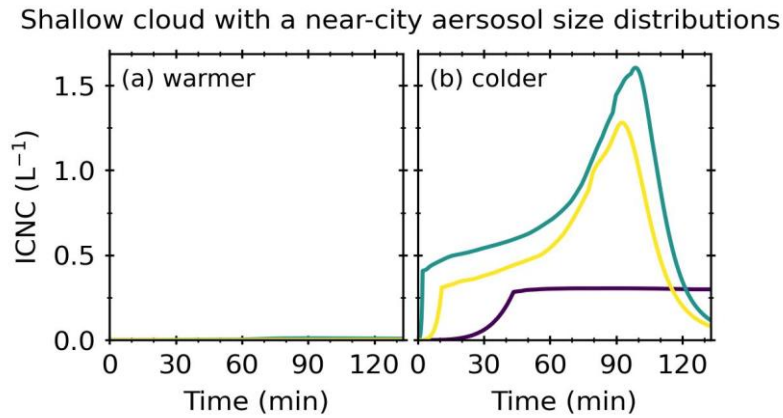

**Figure S8** Control simulation ice crystal number concentrations for shallower clouds (1.3 km deep) with a natural aerosol size distribution. Warmer refers to cloud base temperatures of 7 °C, and colder refers to cloud base temperatures of 0 °C.

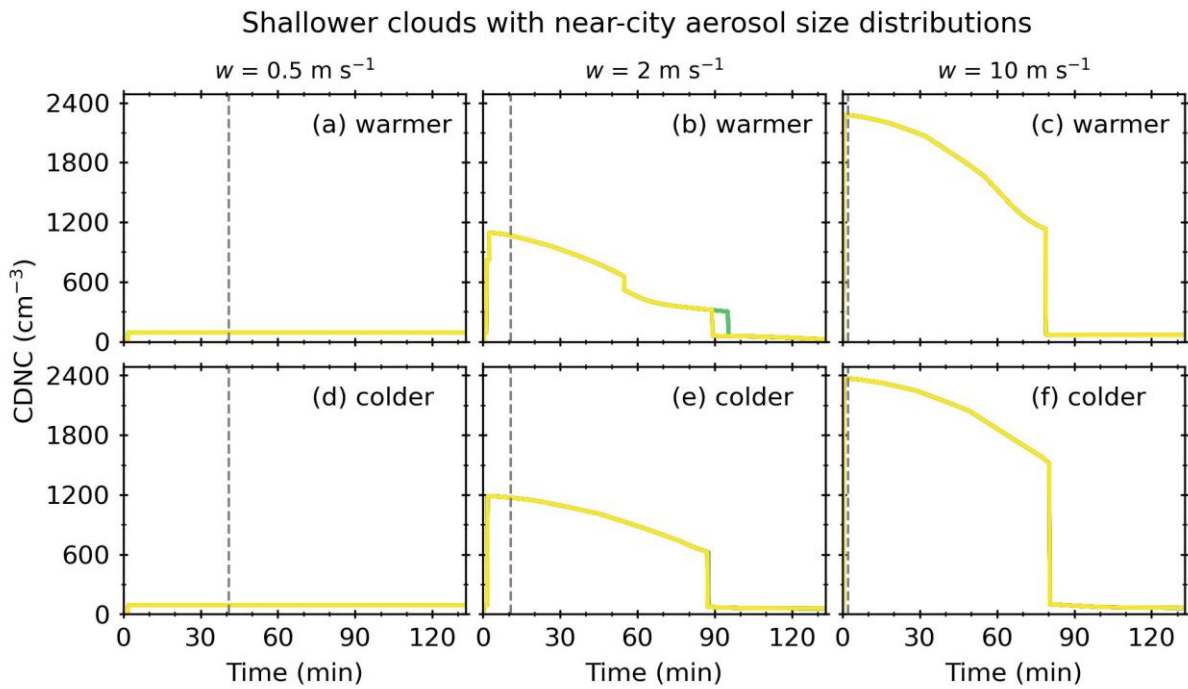

**Figure S9** Cloud drop number concentrations for a shallower cloud (1.3-km deep) with a near-city aerosol size distribution. Warmer refers to cloud base temperatures of 7 °C, and colder refers to cloud base temperatures of 0 °C.

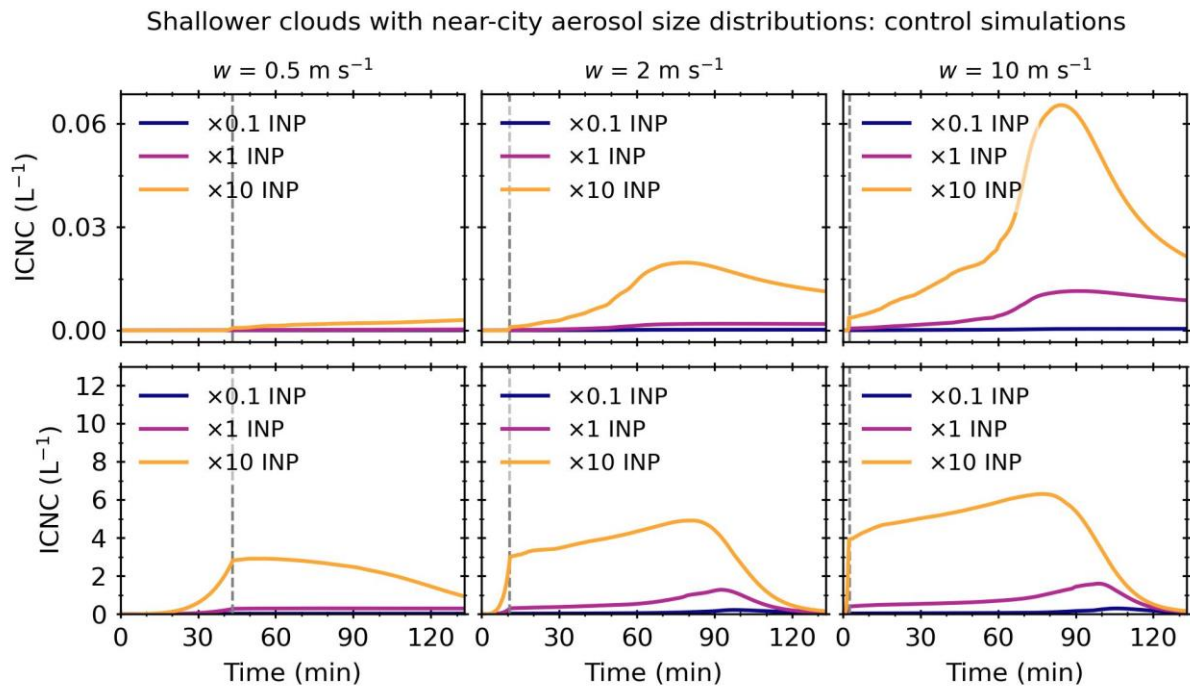

**Figure S10** Ice crystal number concentrations for control simulations against simulation time for three initial INP concentrations ( $\times 0.1$ ,  $\times 1$  and  $\times 10$ ) for a shallower cloud (1.3 km deep) with a near-city aerosol. Warmer refers to cloud base temperatures of  $7\text{ }^{\circ}\text{C}$ , and colder refers to cloud base temperatures of  $0\text{ }^{\circ}\text{C}$ .

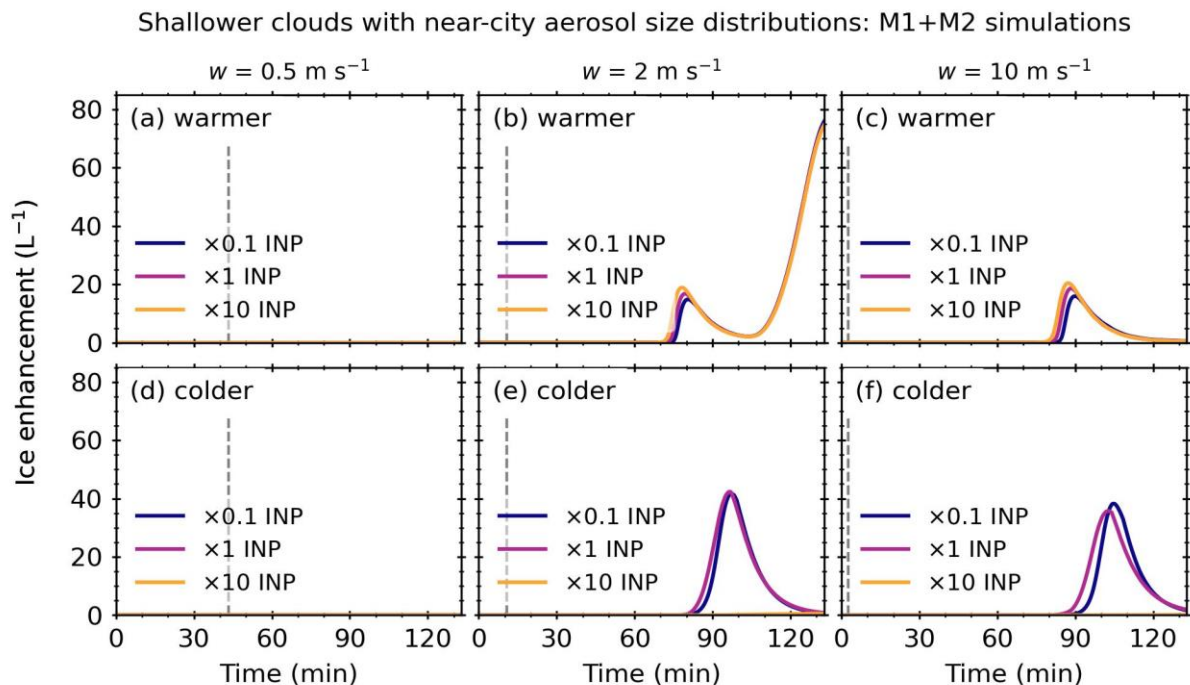

**Figure S11** Mode 1 and mode 2 ice enhancement against simulation time for three INP concentrations ( $\times 0.1$ ,  $\times 1$  and  $\times 10$ ) for a shallower (1.3 km deep) cloud with a near-city aerosol size distribution. Warmer refers to cloud base temperatures of  $7\text{ }^{\circ}\text{C}$ , and colder refers to cloud base temperatures of  $0\text{ }^{\circ}\text{C}$ .

Shallower clouds with near-city aerosol size distributions: CB simulations

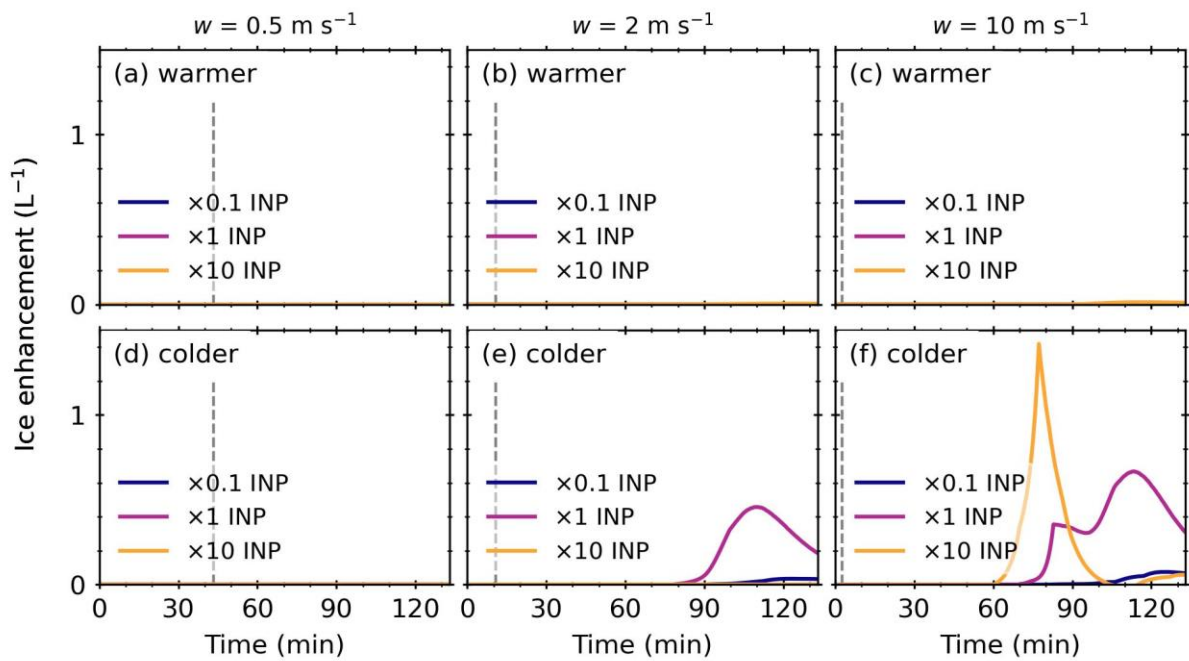

**Figure S12** Ice-ice collisional breakup ice enhancement against simulation time for three INP concentrations ( $\times 0.1$ ,  $\times 1$  and  $\times 10$ ) for a shallower (1.3 km deep) cloud with a natural aerosol size distribution. Warmer refers to cloud base temperatures of 7 °C, and colder refers to cloud base temperatures of 0 °C.



**SECTION S4:** Additional figures for deeper clouds with a natural aerosol size distribution

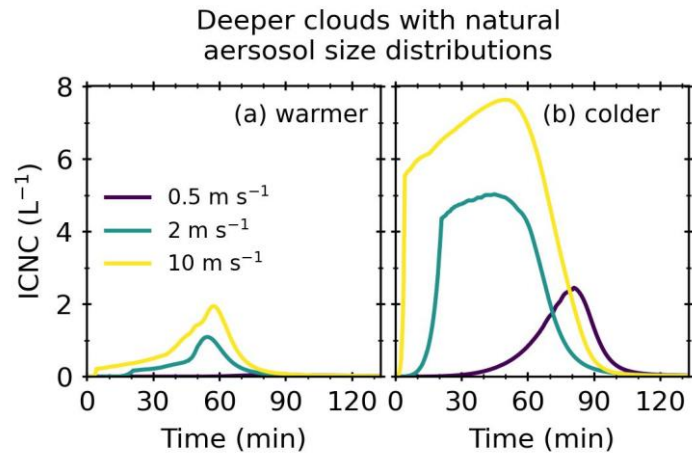

**Figure S13** Control simulation ice crystal number concentrations for deeper clouds (1.3 km deep) with a natural aerosol size distribution. Warmer refers to cloud base temperatures of 7 °C, and colder refers to cloud base temperatures of 0 °C.

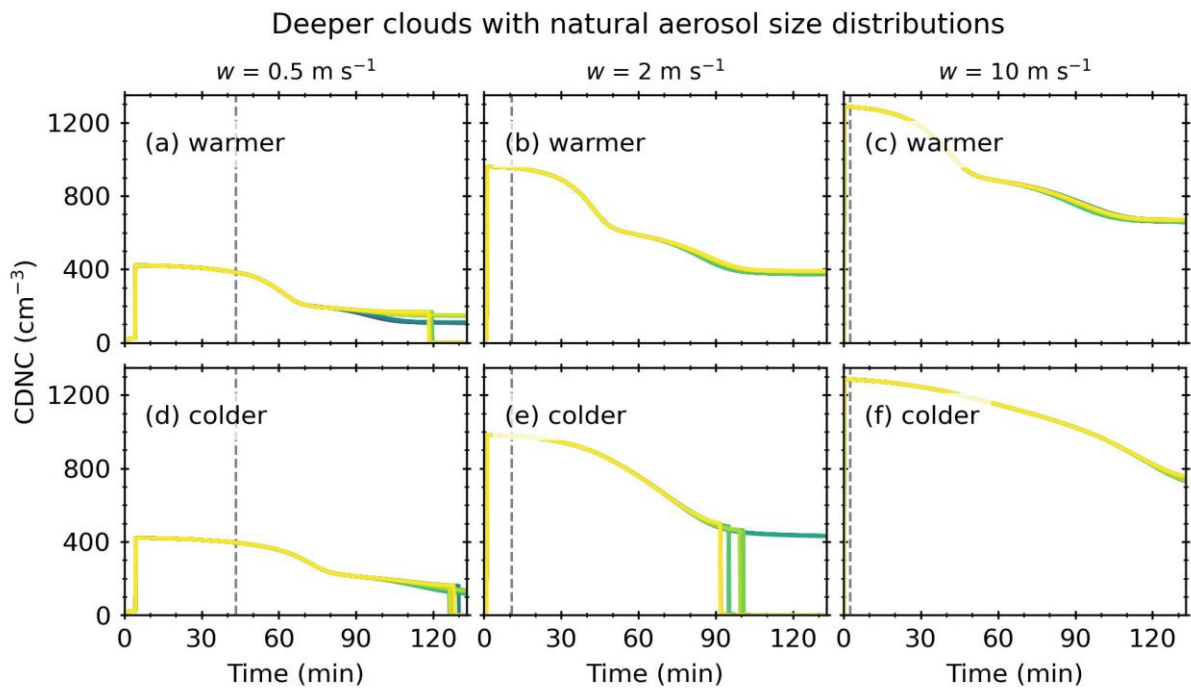

**Figure S14** Cloud drop number concentrations for a deeper cloud (1.3 km deep) with a natural aerosol size distribution. Warmer refers to cloud base temperatures of 7 °C, and colder refers to cloud base temperatures of 0 °C.

**SECTION S5:** Additional figures for deeper clouds with a near-city size distribution

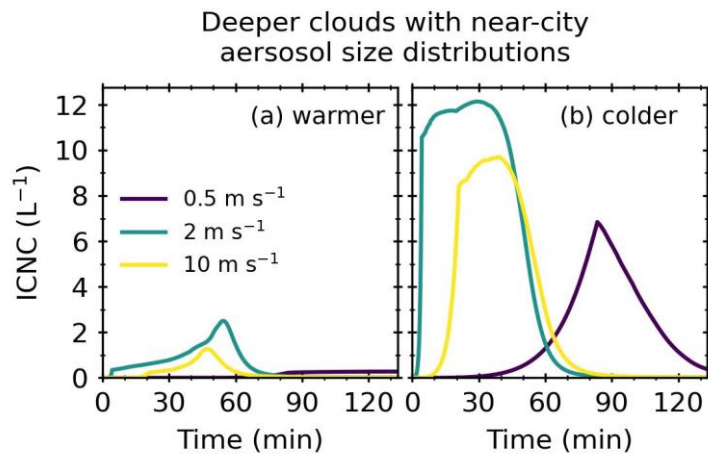

**Figure S15** Control simulation ice crystal number concentrations for deeper clouds (2.4 km deep) with a near-city aerosol size distribution. Warmer refers to cloud base temperatures of 7 °C, and colder refers to cloud base temperatures of 0 °C.

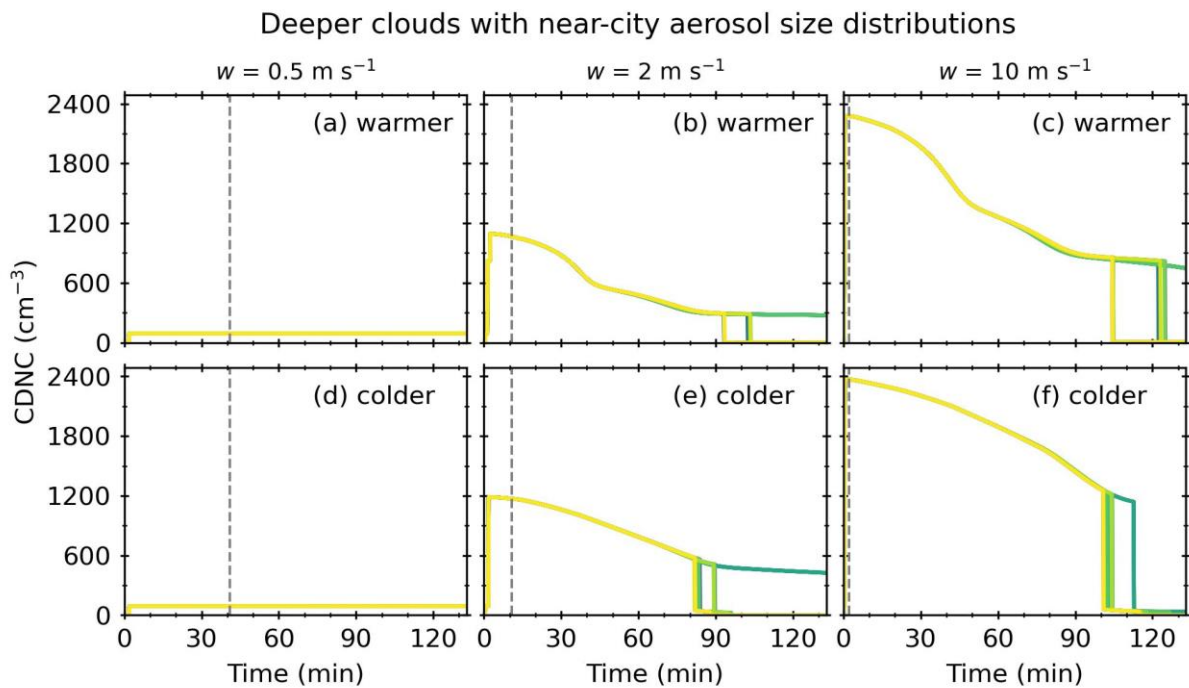

**Figure S16** Cloud drop number concentrations for a deeper cloud (2.4 km deep) with a near-city aerosol size distribution. Warmer refers to cloud base temperatures of 7 °C, and colder refers to cloud base temperatures of 0 °C.

## SECTION S6: Particle and ice size distribution contour plots

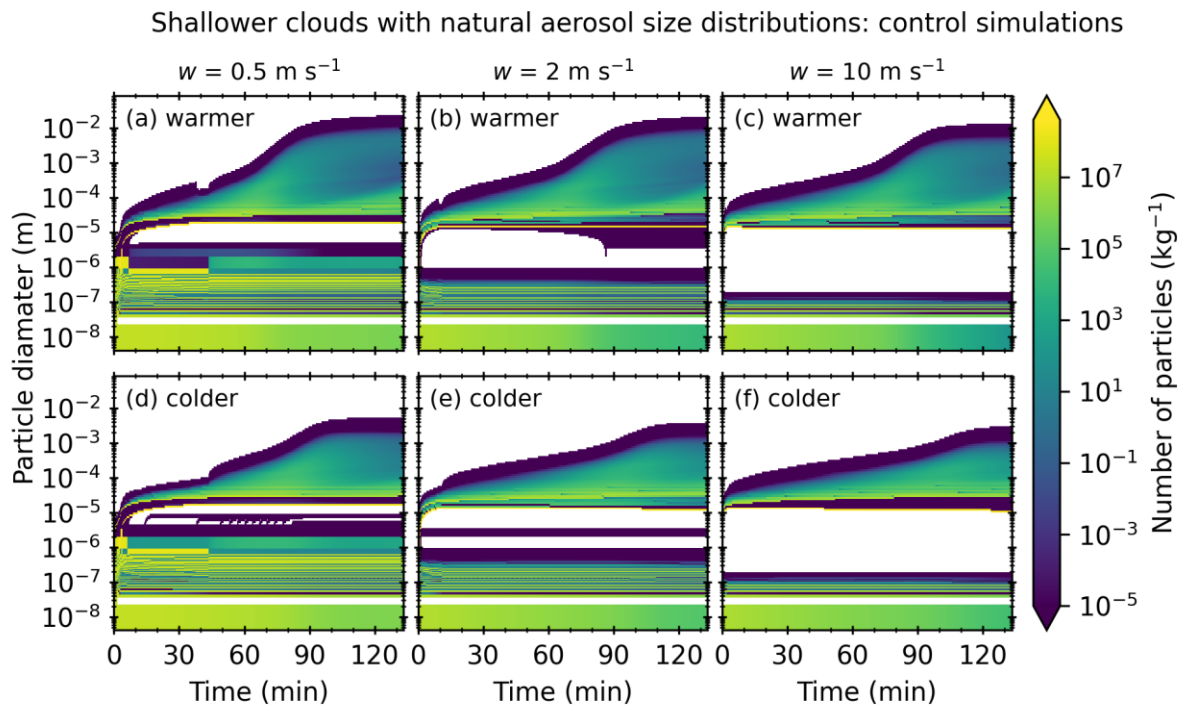

**Figure S17** Contour plot showing the particle size distribution as a function of simulation time for shallower clouds (1.3 km deep) with natural aerosol size distributions. Warmer refers to cloud base temperatures of  $7^\circ\text{C}$ , and colder refers to cloud base temperatures of  $0^\circ\text{C}$ .

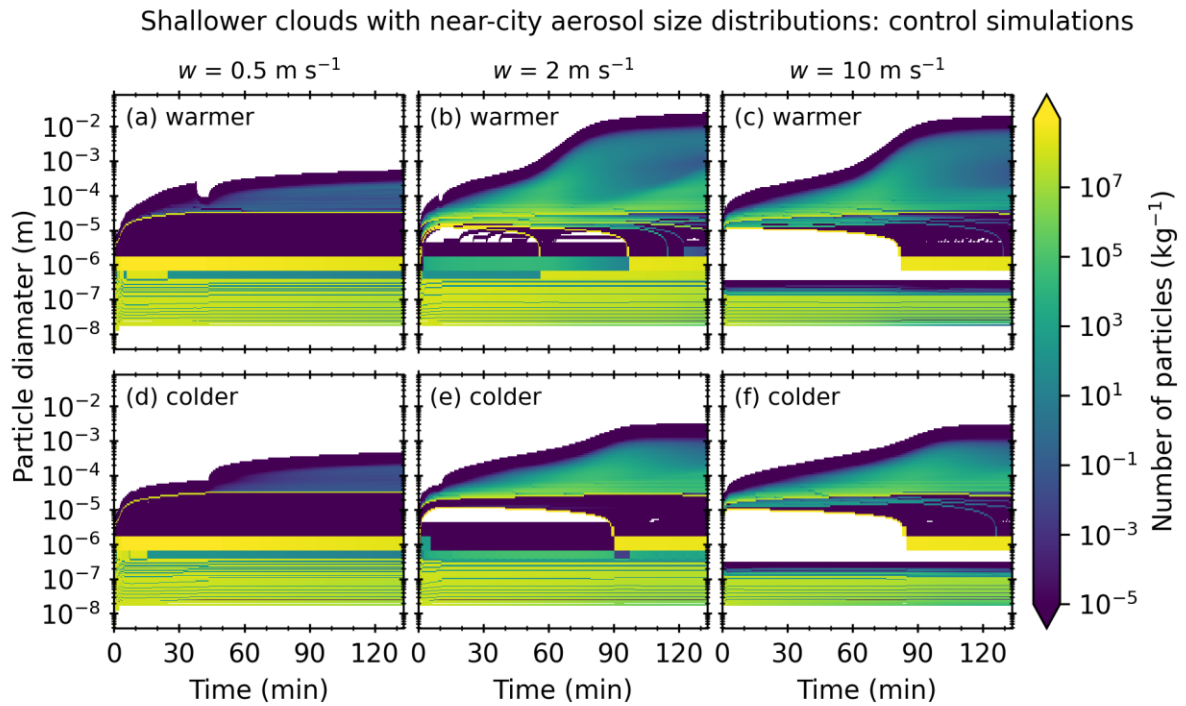

**Figure S18** Contour plot showing the particle size distribution as a function of simulation time for shallower clouds (1.3 km deep) with near-city aerosol size distributions. Warmer refers to cloud base temperatures of 7 °C, and colder refers to cloud base temperatures of 0 °C.

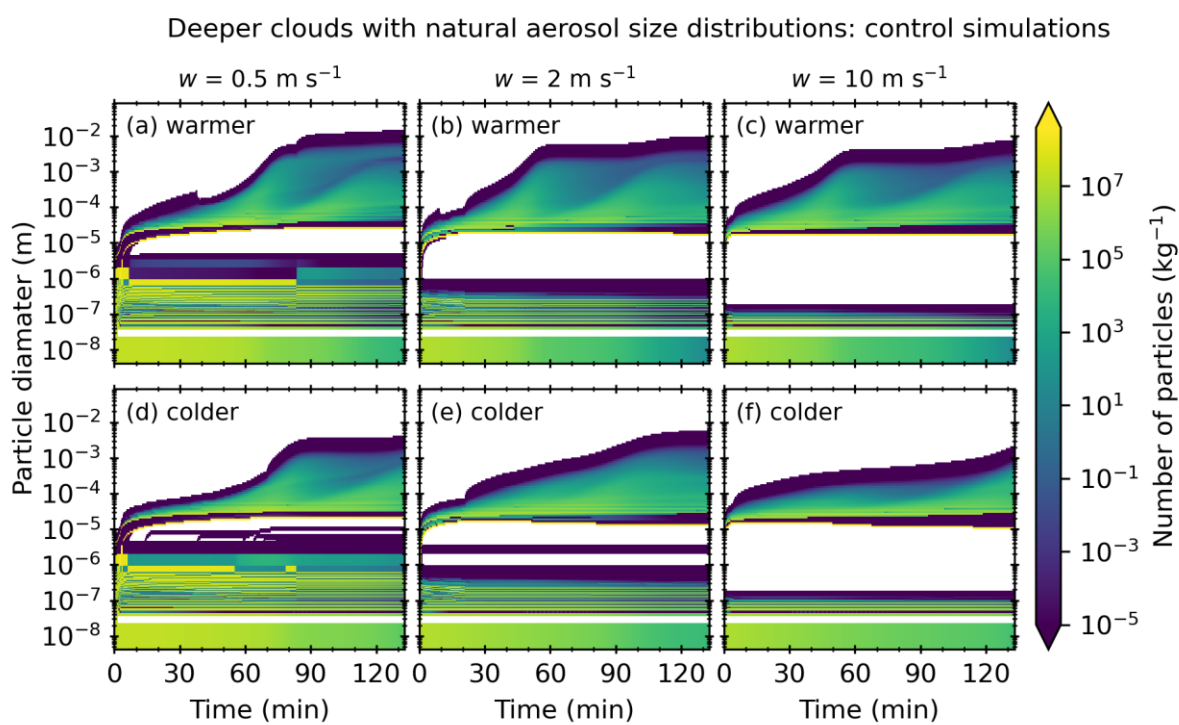

**Figure S19** Contour plot showing the particle size distribution as a function of simulation time for deeper clouds (2.4 km deep) with natural aerosol size distributions. Warmer refers to cloud base temperatures of  $7 \text{ }^\circ\text{C}$ , and colder refers to cloud base temperatures of  $0 \text{ }^\circ\text{C}$ .

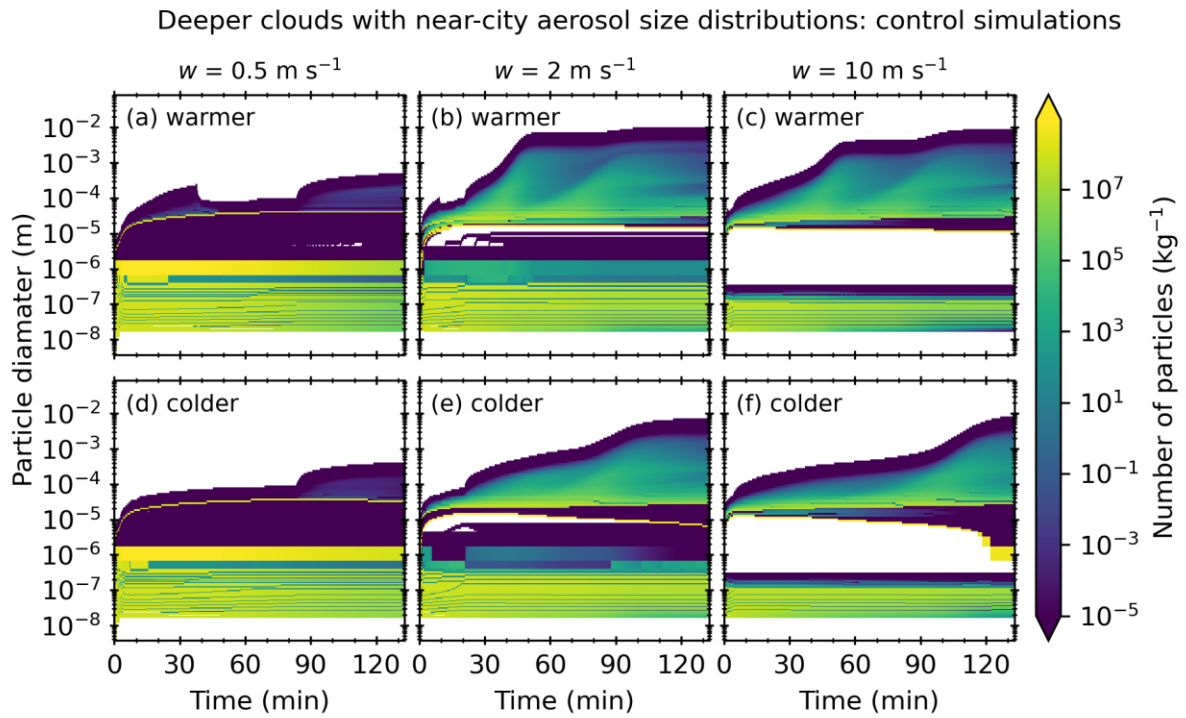

**Figure S20** Contour plot showing the particle size distribution as a function of simulation time for deeper clouds (2.4 km deep) with natural aerosol size distributions. Warmer refers to cloud base temperatures of 7 °C, and colder refers to cloud base temperatures of 0 °C.

## SECTION S7: Ice particle aspect ratio figures

### Shallower clouds with natural aerosol size distributions

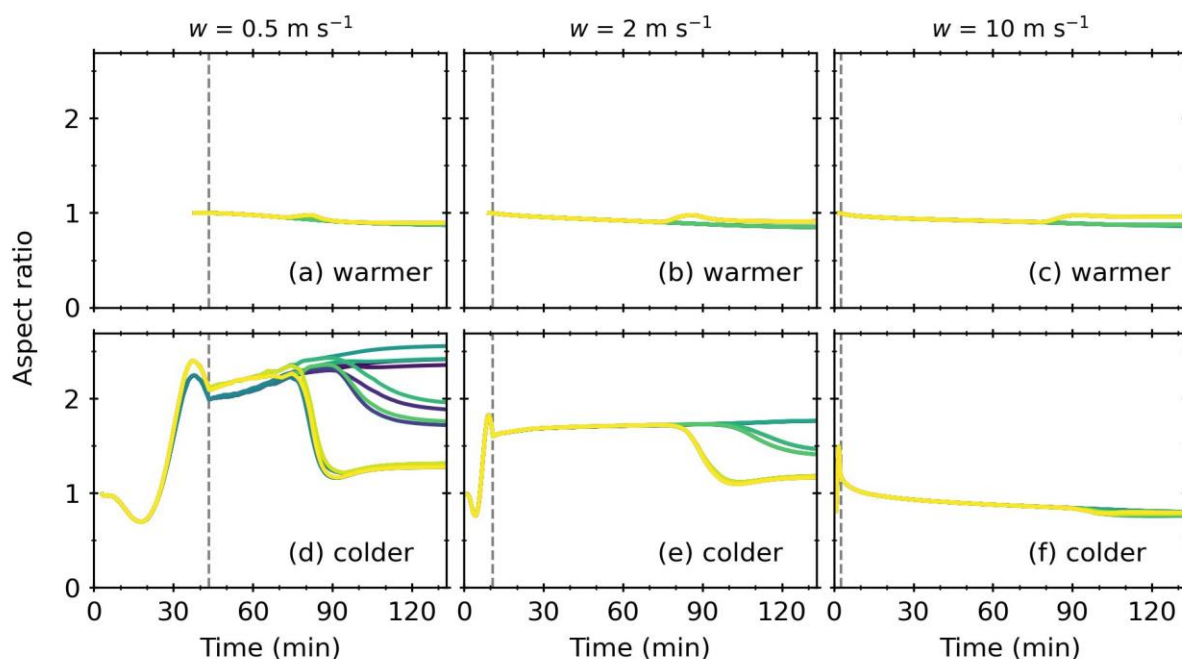

**Figure S21** Ice particle aspect ratio for a shallower cloud (1.3 km deep) with a natural aerosol size distribution. Warmer refers to cloud base temperatures of 7 °C, and colder refers to cloud base temperatures of 0 °C.

### Shallower clouds with near-city aerosol size distributions

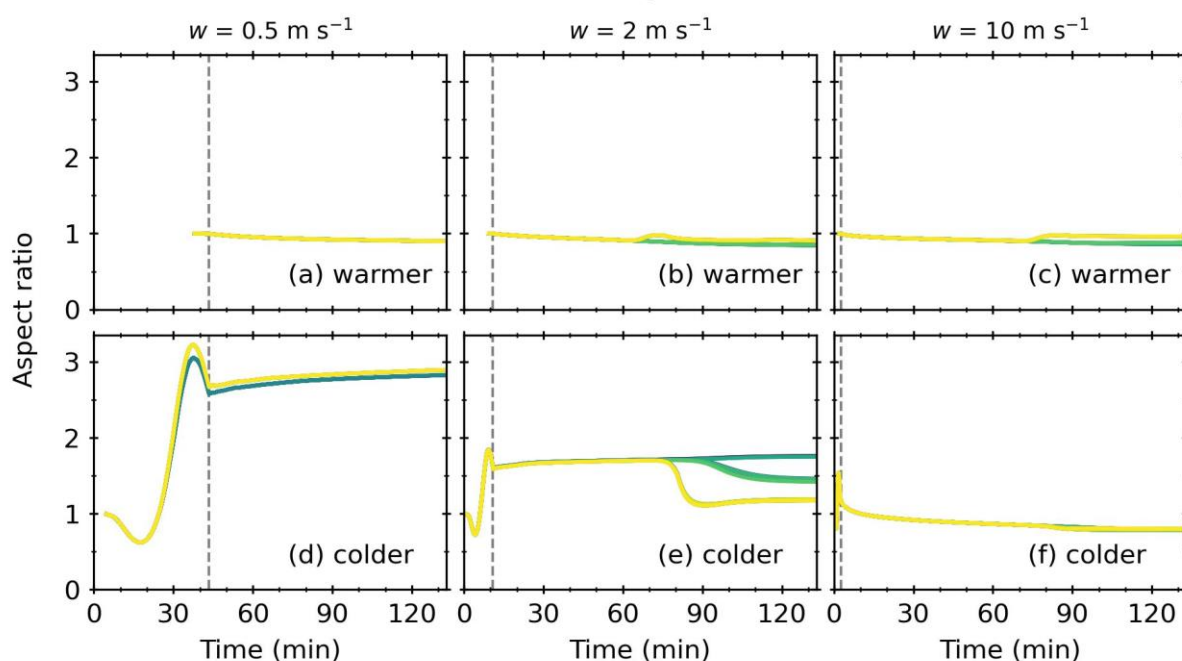

**Figure S22** Ice particle aspect ratio for a shallower cloud (1.3 km deep) with a near-city aerosol size distribution. Warmer refers to cloud base temperatures of 7 °C, and colder refers to cloud base temperatures of 0 °C.

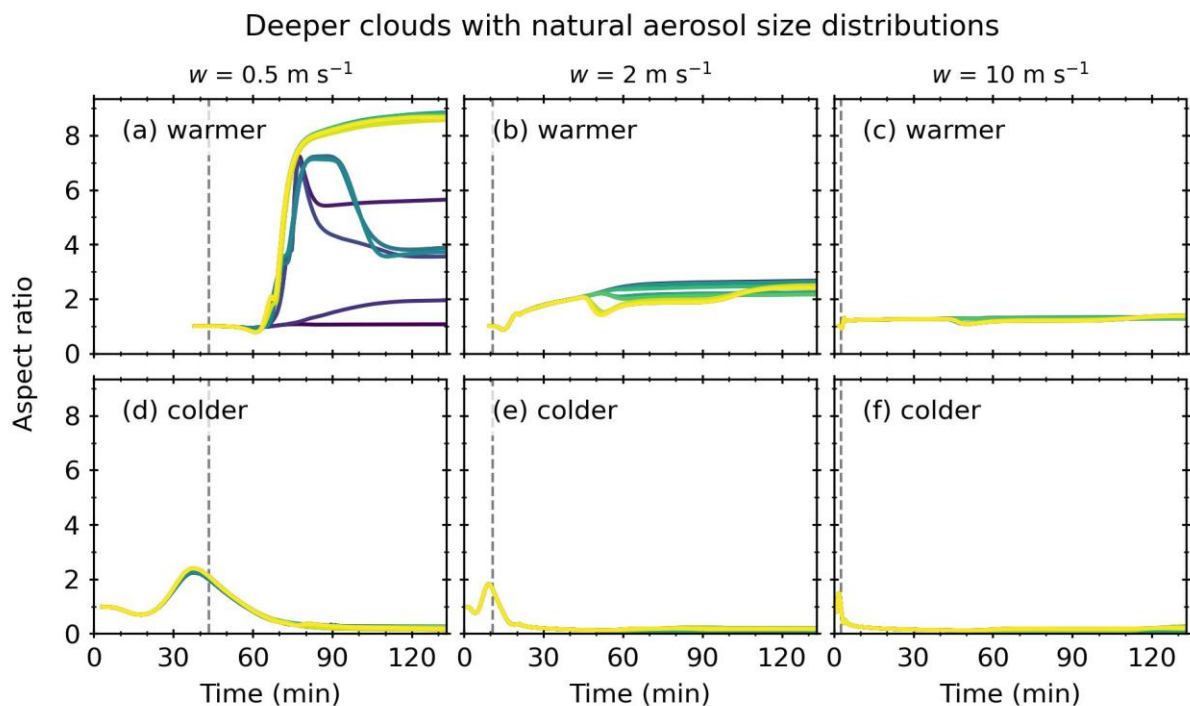

**Figure S23** Ice particle aspect ratio for a deeper cloud (2.4 km deep) with a natural aerosol size distribution. Warmer refers to cloud base temperatures of 7 °C, and colder refers to cloud base temperatures of 0 °C.

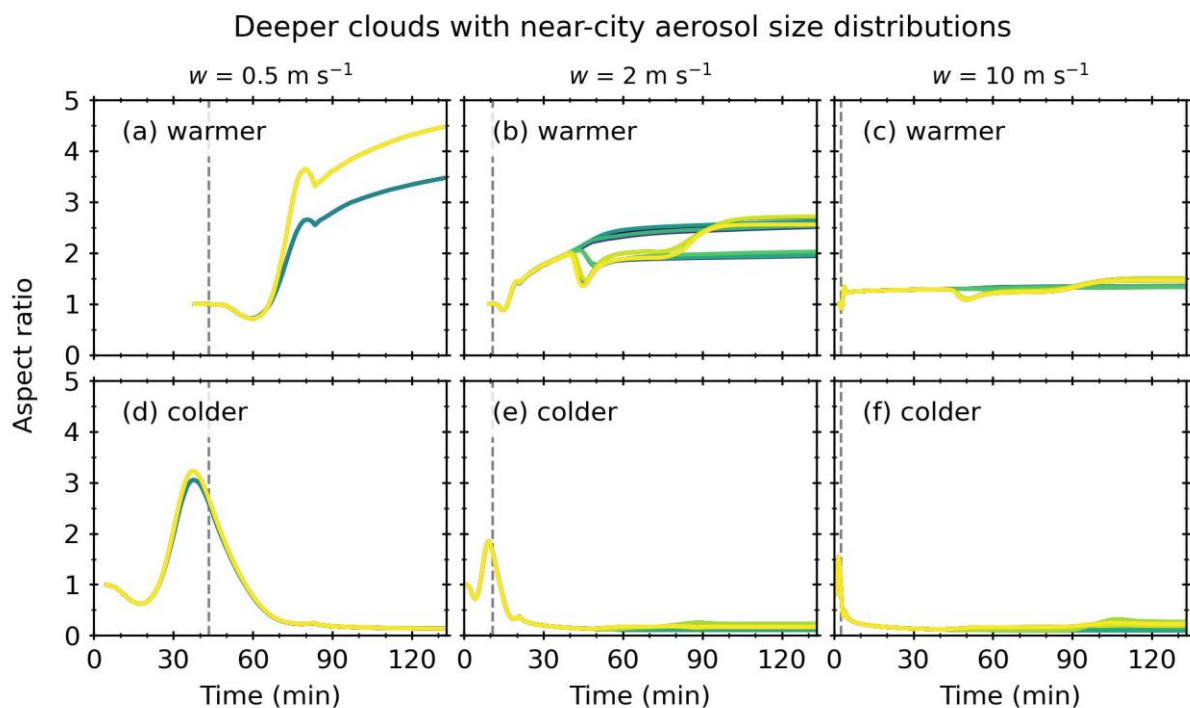

**Figure S24** Ice particle aspect ratio for a deeper cloud (2.4 km deep) with a near-city aerosol size distribution. Warmer refers to cloud base temperatures of 7 °C, and colder refers to cloud base temperatures of 0 °C.



## SECTION S8: Liquid and ice water contents

Shallower clouds with natural aerosol size distributions: M2 simulations

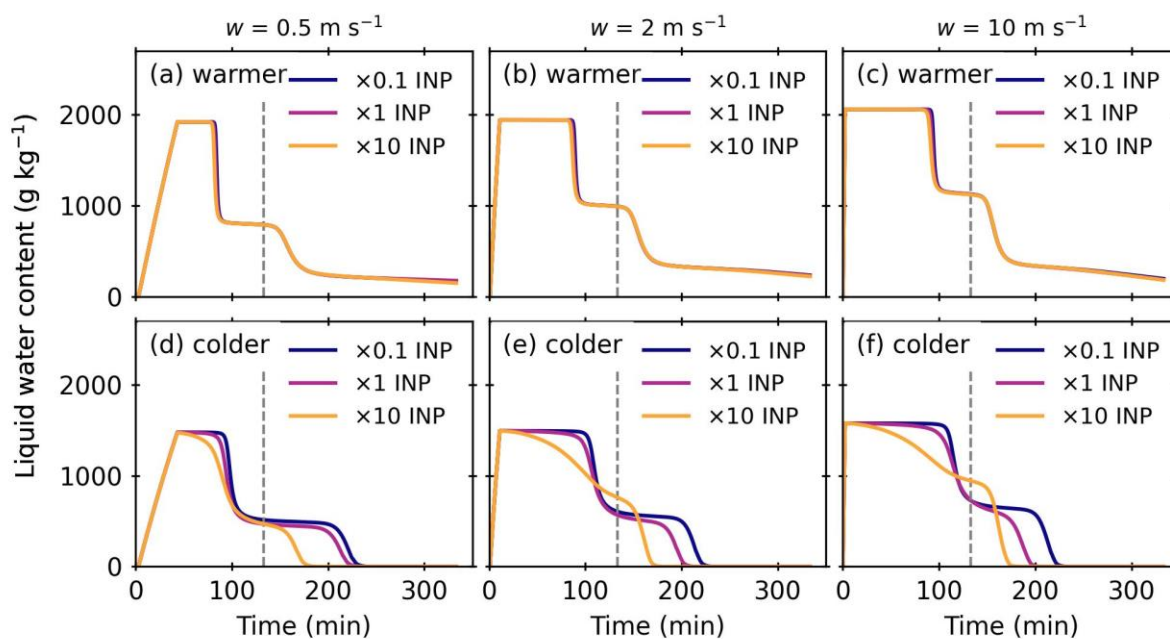

**Figure S25** Liquid water content for a shallower cloud (1.3 km deep) with a natural aerosol size distribution. Warmer refers to cloud base temperatures of 7 °C, and colder refers to cloud base temperatures of 0 °C. These simulations were extended past the 133.3 min runtime, indicated by a grey dashed line, to demonstrate the effects of the Wegener-Bergeron Findeisen process.

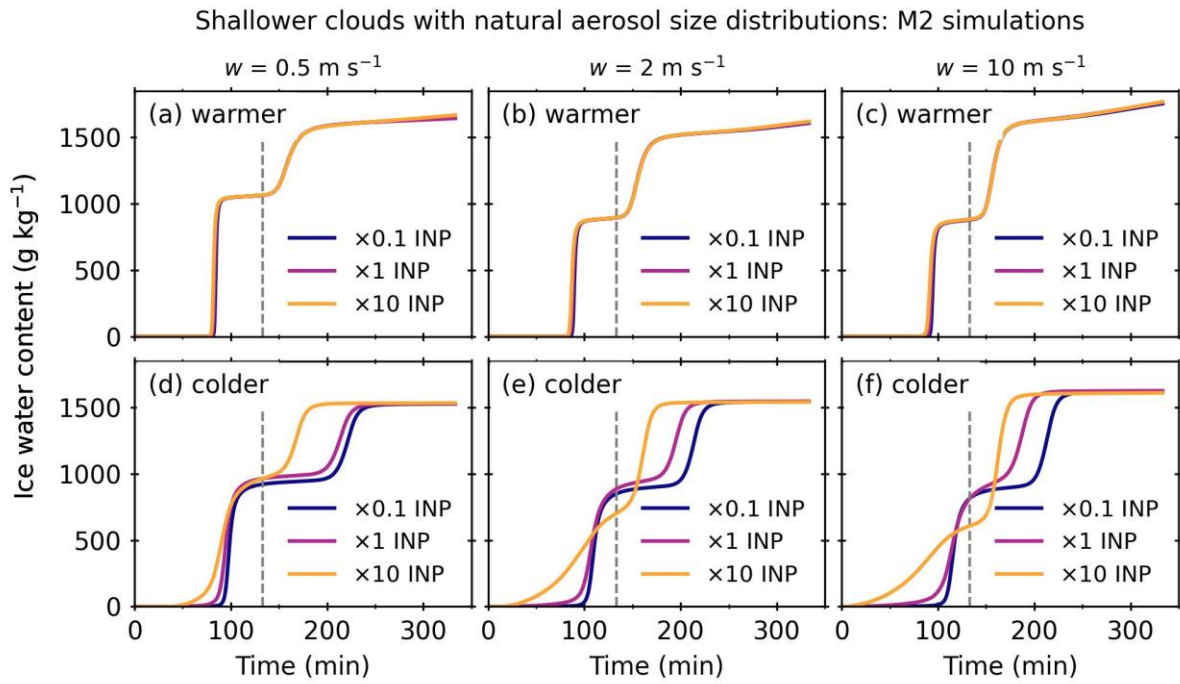

**Figure S26** Ice water content for a shallower cloud (1.3 km deep) with a natural aerosol size distribution. Warmer refers to cloud base temperatures of 7 °C, and colder refers to cloud base temperatures of 0 °C. These simulations were extended past the 133.3 min runtime, indicated by a grey dashed line, to demonstrate the effects of the Wegener-Bergeron Findeisen process.
